# Supplementary material
Source: publisher figshare collection journal article supplement (https://gsajournals.figshare.com/ndownloader/files/30867568)
Supplement: Supplementary file 1 [file 30867568]

**Supplementary Table 2:** Table beet individuals selected for genotyping (n=87), with individual root, same-year F2:3 family mean, and two-year F2:3 family mean geosmin concentrations.

|  |  |  |  | **Geosmin Concentration ()** | | |
| --- | --- | --- | --- | --- | --- | --- |
| **Tail** | **Year** | **Indiv** | **F2:3** **Family** | **Individual Root** | **Same-Year F2:3** **Family Mean** | **Two-Year F2:3 Family Mean** |
| High | 2017 | 295B-1 | 4160 | 41.6 | 19.3 | 18.9 |
| High | 2017 | 098A-2 | 4124 | 36.8 | 25.1 | 21.0 |
| High | 2017 | 098A-1 | 4124 | 34.3 | 25.1 | 21.0 |
| High | 2017 | 705A-2 | 4064 | 29.7 | 18.9 | 21.4 |
| High | 2017 | 502B-2 | 4078 | 27.8 | 17.6 | 17.0 |
| High | 2017 | 706A-1 | 4055 | 26.0 | 21.5 | 20.6 |
| High | 2017 | 297A-2 | 4054 | 25.3 | 14.5 | 17.0 |
| High | 2017 | 304B-2 | 4133 | 24.6 | 16.9 | 17.0 |
| High | 2017 | 101B-1 | 4167 | 24.3 | 17.0 | 17.9 |
| High | 2017 | 303B-1 | 4143 | 24.2 | 18.5 | 18.2 |
| High | 2017 | 101B-2 | 4167 | 22.5 | 17.0 | 17.9 |
| High | 2017 | 303B-2 | 4143 | 22.1 | 18.5 | 18.2 |
| High | 2017 | 297B-2 | 4064 | 19.7 | 18.9 | 21.4 |
| High | 2017 | 706B-2 | 4125 | 19.4 | 15.2 | 17.8 |
| High | 2017 | 304B-1 | 4133 | 19.2 | 16.9 | 17.0 |
| High | 2017 | 498B-1 | 4162 | 18.6 | 18.3 | 16.5 |
| High | 2017 | 498B-2 | 4162 | 18.2 | 18.3 | 16.5 |
| High | 2017 | 690A-2 | 4078 | 17.7 | 17.6 | 17.0 |
| High | 2017 | 106A-1 | 4143 | 17.1 | 18.5 | 18.2 |
| High | 2019 | 1878-1 | 4064 | 31.7 | 24.0 | 21.4 |
| High | 2019 | 1759-1 | 4055 | 28.2 | 20.2 | 20.6 |
| High | 2019 | 1878-2 | 4064 | 26.9 | 24.0 | 21.4 |
| High | 2019 | 1711-1 | 4160 | 26.5 | 18.5 | 18.9 |
| High | 2019 | 1854-1 | 4133 | 25.8 | 17.1 | 17.0 |
| High | 2019 | 1775-2 | 4143 | 25.4 | 17.9 | 18.2 |
| High | 2019 | 1831-1 | 4125 | 24.1 | 19.1 | 17.8 |
| High | 2019 | 1776-2 | 4078 | 22.7 | 16.3 | 17.0 |
| High | 2019 | 1891-1 | 4167 | 22.5 | 18.6 | 17.9 |
| High | 2019 | 1764-2 | 4125 | 22.2 | 19.1 | 17.8 |
| High | 2019 | 1711-2 | 4160 | 22.1 | 18.5 | 18.9 |
| High | 2019 | 1746-2 | 4064 | 20.5 | 24.0 | 21.4 |
| High | 2019 | 1791-1 | 4167 | 20.3 | 18.6 | 17.9 |
| High | 2019 | 1738-2 | 4124 | 20.0 | 17.0 | 21.0 |
| High | 2019 | 1817-2 | 4143 | 19.5 | 17.9 | 18.2 |
| High | 2019 | 1859-2 | 4055 | 19.1 | 20.2 | 20.6 |
| High | 2019 | 1891-2 | 4167 | 18.5 | 18.6 | 17.9 |
| High | 2019 | 1831-2 | 4125 | 18.3 | 19.1 | 17.8 |
| High | 2019 | 1865-2 | 4124 | 17.9 | 17.0 | 21.0 |
| High | 2019 | 1865-1 | 4124 | 17.4 | 17.0 | 21.0 |
| High | 2019 | 1859-1 | 4055 | 17.4 | 20.2 | 20.6 |
| High | 2019 | 1746-1 | 4064 | 16.7 | 24.0 | 21.4 |
| High | 2019 | 1759-2 | 4055 | 16.2 | 20.2 | 20.6 |
| High | 2019 | 1814-1 | 4160 | 13.1 | 18.5 | 18.9 |
| High | 2019 | 1814-2 | 4160 | 12.3 | 18.5 | 18.9 |
| Low | 2017 | 104A-1 | 4086 | 4.6 | 3.8 | 4.0 |
| Low | 2017 | 498A-2 | 4047 | 4.3 | 3.5 | 3.8 |
| Low | 2017 | 690B-1 | 4037 | 4.0 | 3.6 | 3.9 |
| Low | 2017 | 111B-1 | 4105 | 3.9 | 3.9 | 3.5 |
| Low | 2017 | 104B-2 | 4047 | 3.5 | 3.5 | 3.8 |
| Low | 2017 | 498A-1 | 4047 | 3.4 | 3.5 | 3.8 |
| Low | 2017 | 690B-2 | 4037 | 3.2 | 3.6 | 3.9 |
| Low | 2017 | 506B-1 | 4001 | 3.0 | 4.5 | 4.1 |
| Low | 2017 | 503B-1 | 4086 | 2.9 | 3.8 | 4.0 |
| Low | 2017 | 104A-2 | 4086 | 2.9 | 3.8 | 4.0 |
| Low | 2017 | 500B-1 | 4027 | 2.8 | 3.3 | 2.8 |
| Low | 2017 | 104B-1 | 4047 | 2.8 | 3.5 | 3.8 |
| Low | 2017 | 309B-1 | 4131 | 2.5 | 4.5 | 5.1 |
| Low | 2017 | 512B-2 | 4144 | 2.2 | 4.2 | 4.1 |
| Low | 2017 | 707A-2 | 4027 | 2.1 | 3.9 | 3.5 |
| Low | 2017 | 094A-1 | 4105 | 2.1 | 3.3 | 2.8 |
| Low | 2017 | 689A-1 | 4052 | 1.9 | 5.1 | 5.6 |
| Low | 2017 | 310B-1 | 4002 | 1.7 | 1.4 | 3.2 |
| Low | 2017 | 113A-1 | 4000 | 1.6 | 4.3 | 5.6 |
| Low | 2017 | 310B-2 | 4002 | 1.2 | 1.4 | 3.2 |
| Low | 2019 | 1793-1 | 4105 | 4.2 | 3.0 | 3.5 |
| Low | 2019 | 1728-2 | 4047 | 4.2 | 4.0 | 3.8 |
| Low | 2019 | 1742-1 | 4027 | 3.8 | 2.4 | 2.8 |
| Low | 2019 | 1793-2 | 4105 | 3.7 | 3.0 | 3.5 |
| Low | 2019 | 1883-1 | 4001 | 3.7 | 3.6 | 4.1 |
| Low | 2019 | 1868-1 | 4002 | 3.5 | 4.1 | 3.2 |
| Low | 2019 | 1748-2 | 4086 | 3.3 | 4.2 | 4.0 |
| Low | 2019 | 1728-1 | 4047 | 3.2 | 4.0 | 3.8 |
| Low | 2019 | 1855-2 | 4037 | 2.9 | 4.1 | 3.9 |
| Low | 2019 | 1862-1 | 4120 | 2.8 | 3.7 | 4.2 |
| Low | 2019 | 1742-2 | 4027 | 2.8 | 2.4 | 2.8 |
| Low | 2019 | 1824-2 | 4144 | 2.7 | 4.1 | 4.1 |
| Low | 2019 | 1780-2 | 4105 | 2.6 | 3.0 | 3.5 |
| Low | 2019 | 1824-1 | 4144 | 2.5 | 4.1 | 4.1 |
| Low | 2019 | 1715-2 | 4037 | 2.4 | 4.1 | 3.9 |
| Low | 2019 | 1868-2 | 4002 | 2.4 | 4.1 | 3.2 |
| Low | 2019 | 1847-2 | 4027 | 2.3 | 2.4 | 2.8 |
| Low | 2019 | 1862-2 | 4120 | 2.3 | 3.7 | 4.2 |
| Low | 2019 | 1766-2 | 4001 | 2.2 | 3.6 | 4.1 |
| Low | 2019 | 1727-1 | 4053 | 2.1 | 4.1 | 4.6 |
| Low | 2019 | 1809-1 | 4086 | 2.0 | 4.2 | 4.0 |
| Low | 2019 | 1780-1 | 4105 | 1.7 | 3.0 | 3.5 |
| Low | 2019 | 1847-1 | 4027 | 0.8 | 2.4 | 2.8 |
